# Supplementary material
Source: PubMed Central journal article supplement (PMC3102549)
Supplement: supp_mol.110.069807_JenkinsetalSupplement.pdf [file supp_mol.110.069807_JenkinsetalSupplement.pdf]

**Supplemental Data for *Molecular Pharmacology* article:**

**Negative Gating Modulation by (*R*)-*N*-(Benzimidazol-2-yl)-tetrahydro-1-naphthylamine (NS8593) Depends on Residues in the Inner Pore Vestibule:  
Pharmacological Evidence of Deep-Pore Gating of K<sub>Ca</sub>2 Channels**

David Paul Jenkins, Dorte Strøbæk, Charlotte Hougaard, Marianne L. Jensen, Rene Hummel,  
Ulrik S. Sørensen, Palle Christophersen, Heike Wulff

*Department of Pharmacology, University of California, Davis, CA 95616, USA (D.P.J., H.W.);  
and NeuroSearch A/S, Pederstrupvej 93, DK2750 Ballerup, Denmark (C.H., M.L.J., R.H., U.S.S.,  
P.C., D.S.)*

This file contains:

1 Supplemental Table with information on additional chimeras.

**Supplemental Table 1: Additional Chimeras**

| <b><i>Non-functional or pharmacologically "oddly"-behaving chimeras</i></b>                                                                                                            |                                                     |                                                                                      |                                        |                                                                           |
|----------------------------------------------------------------------------------------------------------------------------------------------------------------------------------------|-----------------------------------------------------|--------------------------------------------------------------------------------------|----------------------------------------|---------------------------------------------------------------------------|
|                                                                                                                                                                                        | <b>NS8593<br/>IC<sub>50</sub> [nM]</b>              | <b>Fold current<br/>increase by NS309</b>                                            | <b>% current<br/>inhibition by BMB</b> | <b>Comments</b>                                                           |
| <p>K<sub>Ca</sub>2.3-K<sub>Ca</sub>3.1<sub>(233-281)</sub>-K<sub>Ca</sub>2.3<sub>(490-731)</sub></p> 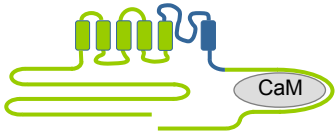 | Not tested                                          | No current increase<br>(n = 5 cells)                                                 | Not tested                             | < 200 pA current<br>(n = 5 cells)                                         |
| <p>K<sub>Ca</sub>2.3-K<sub>Ca</sub>3.1<sub>(233-427)</sub></p>                                        | No inhibition at<br>0.3 μM (n=1) or<br>10 μM (n=2). | No current increase<br>at 0.03 μM (n=2) and<br>only small increase at<br>10 μM (n=2) | Not tested                             | Inhibition by ChTX<br>(n = 1) and TRAM-<br>34 (n=3)                       |
| <p>K<sub>Ca</sub>3.1-K<sub>Ca</sub>2.3<sub>(539-731)</sub></p>                                        | Not tested                                          | Not modulated at 0.3<br>μM (n = 2)                                                   | Not tested                             | No current<br>(n = 10 cells)                                              |
| <b><i>Functionally "redundant" chimeras</i></b>                                                                                                                                        |                                                     |                                                                                      |                                        |                                                                           |
| <p>K<sub>Ca</sub>2.3-K<sub>Ca</sub>3.1<sub>(292-427)</sub></p>                                      | 250 ± 60 (4)                                        | 126 ± 2 (2)                                                                          | 89 ± 5 (4)                             | Increased Ca <sup>2+</sup> -<br>sensitivity in inside-<br>out experiments |
| <p>K<sub>Ca</sub>2.3-K<sub>Ca</sub>3.1<sub>(378-427)</sub></p>                                      | 107 ± 11 (2)                                        | 199 ± 15 (3)                                                                         | 90 ± 6 (3)                             |                                                                           |
| <p>K<sub>Ca</sub>3.1-K<sub>Ca</sub>2.3<sub>(294-642)</sub>-K<sub>Ca</sub>3.1</p>                    | 457 (1)                                             | 130 ± 11 (2)                                                                         | 91 ± 13 (2)                            |                                                                           |
| <p>K<sub>Ca</sub>2.3-K<sub>Ca</sub>3.1<sub>(404-427)</sub></p>                                      | 52 (1)                                              | 209 (1)                                                                              | 100 (1)                                |                                                                           |
| <p>K<sub>Ca</sub>3.1-K<sub>Ca</sub>2.3<sub>(644-731)</sub></p>                                      | >10 μM (2)                                          | 400 ± 0 (2)                                                                          | 0 (2)                                  |                                                                           |

**Table 1:** List of chimeras not included in the main article because they were either found to be non-functional/low expressing (1-3) or because they were considered to yield only supportive but not additional information with respect to defining the site- or mode-of-action of NS8593 (4-8). The cartoons are color coded with the K<sub>Ca</sub>2.3 derived sequence in green and the K<sub>Ca</sub>3.1 sequence in blue. Data are given as n (the number of independent experiments) ± SEM (standard error of the mean). All chimaeras were constructed, expressed and evaluated as detailed in the *Materials and Methods* section of the article. The concentrations used of NS309 (6,7-dichloro-1*H*-indole-2,3-dione 3-oxime) and BMB (bicuculline methobromid) were 30 nM and 100 μM, respectively.
